# Supplementary material for: Neonatal assessment in the delivery room – Trial to Evaluate a Specified Type of Apgar (TEST-Apgar)
Source: Springer Nature journal article supplement (doi:10.1186/s12887-015-0334-7), 2015-03-07
Supplement: MOESM1 [file 9746856]

**Additional File 1, Table A. Expanded-Apgar and the relative risk for poor outcome and morbidity in survivors**

| <i>Expanded-Apgar</i> |                   | Poor Outcome |          |                     |         | Morbidity in Survivors |                     |         |
|-----------------------|-------------------|--------------|----------|---------------------|---------|------------------------|---------------------|---------|
|                       |                   | N (%)        | n (%)    | RR (95%-CI)         | P-value | n (%)                  | RR (95%-CI)         | P-value |
| <b>1 minute</b>       | <b>0-2 points</b> | 54 (3)       | 36 (67)  | 2.35 (1.82 to 3.04) | <.001   | 23 (43)                | 1.70 (1.19 to 2.45) | 0.007   |
|                       | <b>3-4</b>        | 732 (40)     | 411 (56) | 1.98 (1.65 to 2.38) | <.001   | 299 (41)               | 1.63 (1.33 to 2.01) | <.001   |
|                       | <b>5-6</b>        | 709 (39)     | 286 (40) | 1.42 (1.17 to 1.73) | <.001   | 237 (33)               | 1.34 (1.08 to 1.66) | 0.006   |
|                       | <b>7</b>          | 328 (18)     | 93 (28)  | 1.00                |         | 82 (25)                | 1.00                |         |
| <b>5 minutes</b>      | <b>0-2</b>        | 74 (4)       | 59 (80)  | 3.70 (2.83 to 4.82) | <.001   | 36 (49)                | 2.73 (1.91 to 3.90) | <.001   |
|                       | <b>3-4</b>        | 697 (38)     | 427 (61) | 2.84 (2.22 to 3.64) | <.001   | 319 (46)               | 2.57 (1.93 to 3.40) | <.001   |
|                       | <b>5-6</b>        | 818 (45)     | 299 (37) | 1.69 (1.31 to 2.19) | <.001   | 249 (30)               | 1.71 (1.28 to 2.28) | <.001   |
|                       | <b>7</b>          | 241 (13)     | 52 (22)  | 1.00                |         | 43 (18)                | 1.00                |         |
| <b>10 minutes</b>     | <b>0-2</b>        | 145 (8)      | 100 (69) | 3.36 (2.55 to 4.43) | <.001   | 72 (50)                | 2.92 (2.10 to 4.05) | <.001   |
|                       | <b>3-4</b>        | 493 (28)     | 331 (67) | 3.27 (2.52 to 4.25) | <.001   | 244 (49)               | 2.91 (2.15 to 3.92) | <.001   |
|                       | <b>5-6</b>        | 921 (52)     | 334 (36) | 1.77 (1.35 to 2.31) | <.001   | 271 (29)               | 1.73 (1.28 to 2.34) | <.001   |
|                       | <b>7</b>          | 229 (13)     | 47 (21)  | 1.00                |         | 39 (17)                | 1.00                |         |

**Legend:** Shown are absolute numbers (N) of patients with the respective scores and numbers of patients (n). Relative risk (RR), 95%-Confidence Interval (95%-CI) and P-values were calculated for any of the outcome data using the highest score (7) of the *Expanded-Apgar* as reference value.

Additional File 1, Table B. *Expanded-Apgar* and the relative risk of death and perinatal mortality

| <i>Expanded-Apgar</i> |                   | Death    |          |                      |         | Perinatal Mortality |                       |         |
|-----------------------|-------------------|----------|----------|----------------------|---------|---------------------|-----------------------|---------|
|                       |                   | N (%)    | n (%)    | RR (95%-CI)          | P-value | n (%)               | RR (95%-CI)           | P-value |
| <b>1 minute</b>       | <b>0-2 points</b> | 54 (3)   | 13 (24)  | 7.18 (3.39 to 15.19) | <.001   | 8 (15)              | 12.15 (3.79 to 38.95) | <.001   |
|                       | <b>3-4</b>        | 732 (40) | 112 (15) | 4.56 (2.49 to 8.36)  | <.001   | 63 (9)              | 7.06 (2.59 to 19.23)  | <.001   |
|                       | <b>5-6</b>        | 709 (39) | 49 (7)   | 2.06 (1.09 to 3.91)  | 0.02    | 17 (2)              | 1.97 (0.67 to 5.80)   | 0.21    |
|                       | <b>7</b>          | 328 (18) | 11 (3)   | 1.00                 |         | 4 (1)               | 1.00                  |         |
| <b>5 minutes</b>      | <b>0-2</b>        | 74 (4)   | 23 (31)  | 8.32 (4.03 to 17.19) | <.001   | 11 (15)             | 8.96 (2.94 to 27.29)  | <.001   |
|                       | <b>3-4</b>        | 697 (38) | 108 (15) | 4.15 (2.14 to 8.06)  | <.001   | 60 (9)              | 5.19 (1.91 to 14.12)  | <.001   |
|                       | <b>5-6</b>        | 818 (45) | 50 (6)   | 1.64 (0.82 to 3.28)  | 0.15    | 18 (2)              | 1.33 (0.45 to 3.88)   | 0.60    |
|                       | <b>7</b>          | 241 (13) | 9 (4)    | 1.00                 |         | 4 (2)               | 1.00                  |         |
| <b>10 minutes</b>     | <b>0-2</b>        | 145 (8)  | 28 (19)  | 5.53 (2.59 to 11.79) | <.001   | 18 (12)             | 9.48 (2.84 to 31.60)  | <.001   |
|                       | <b>3-4</b>        | 493 (28) | 87 (18)  | 5.05 (2.49 to 10.24) | <.001   | 46 (9)              | 7.12 (2.24 to 22.66)  | <.001   |
|                       | <b>5-6</b>        | 921 (52) | 63 (7)   | 1.96 (0.95 to 4.03)  | 0.05    | 25 (3)              | 2.07 (0.63 to 6.80)   | 0.21    |
|                       | <b>7</b>          | 229 (13) | 8 (4)    | 1.00                 |         | 3 (1)               | 1.00                  |         |

**Legend:** Shown are absolute numbers (N) of patients with the respective scores and numbers of patients (n). Relative risk (RR), 95%-Confidence Interval (95%-CI) and P-values were calculated for any of the outcome data using the highest score (7) of the *Expanded-Apgar* as reference value.

Additional File 1, Table C. *Expanded-Apgar* and the relative risk for BPD and ROP

| <i>Expanded-Apgar</i> |                   | N (%)    | Bronchopulmonary Dysplasia |                      |         | Retinopathy of Prematurity |                       |         |
|-----------------------|-------------------|----------|----------------------------|----------------------|---------|----------------------------|-----------------------|---------|
|                       |                   |          | n (%)                      | RR (95%-CI)          | P-value | n (%)                      | RR (95%-CI)           | P-value |
| <b>1 minute</b>       | <b>0-2 points</b> | 54 (3)   | 14 (26)                    | 2.30 (1.33 to 3.96)  | 0.003   | 8 (15)                     | 4.86 (2.01 to 11.76)  | <.001   |
|                       | <b>3-4</b>        | 732 (40) | 195 (27)                   | 2.36 (1.70 to 3.27)  | <.001   | 132 (18)                   | 5.91 (3.15 to 11.10)  | <.001   |
|                       | <b>5-6</b>        | 709 (39) | 162 (23)                   | 2.03 (1.45 to 2.82)  | <.001   | 80 (11)                    | 3.70 (1.94 to 7.05)   | <.001   |
|                       | <b>7</b>          | 328 (18) | 37 (11)                    | 1.00                 |         | 10 (3)                     | 1.00                  |         |
| <b>5 minutes</b>      | <b>0-2</b>        | 74 (4)   | 29 (39)                    | 5.90 (3.40 to 10.25) | <.001   | 19 (26)                    | 15.47 (5.43 to 44.04) | <.001   |
|                       | <b>3-4</b>        | 697 (38) | 217 (31)                   | 4.69 (2.88 to 7.63)  | <.001   | 140 (20)                   | 12.10 (4.53 to 32.34) | <.001   |
|                       | <b>5-6</b>        | 818 (45) | 152 (19)                   | 2.80 (1.71 to 4.59)  | <.001   | 70 (9)                     | 5.16 (1.90 to 13.98)  | <.001   |
|                       | <b>7</b>          | 241 (13) | 16 (7)                     | 1.00                 |         | 4 (2)                      | 1.00                  |         |
| <b>10 minutes</b>     | <b>0-2</b>        | 145 (8)  | 56 (39)                    | 4.42 (2.77 to 7.05)  | <.001   | 34 (23)                    | 5.97 (2.95 to 12.07)  | <.001   |
|                       | <b>3-4</b>        | 493 (28) | 169 (34)                   | 3.93 (2.54 to 6.07)  | <.001   | 108 (22)                   | 5.57 (2.88 to 10.80)  | <.001   |
|                       | <b>5-6</b>        | 921 (52) | 152 (17)                   | 1.89 (1.21 to 2.94)  | 0.003   | 74 (8)                     | 2.04 (1.04 to 4.02)   | 0.03    |
|                       | <b>7</b>          | 229 (13) | 20 (9)                     | 1.00                 |         | 9 (4)                      | 1.00                  |         |

**Legend:** Shown are absolute numbers (N) of patients with the respective scores and numbers of patients (n). Relative risk (RR), 95%-Confidence Interval (95%-CI) and P-values were calculated for any of the outcome data using the highest score (7) of the *Expanded-Apgar* as reference value.

Additional File 1, Table D. *Expanded-Apgar* and the relative risk for IVH and CPL

| <i>Expanded-Apgar</i> |                   | N (%)    | Intraventricular Haemorrhage > Grade 3 |                       |         | Cystic Periventricular Leukomalacia |                      |         |
|-----------------------|-------------------|----------|----------------------------------------|-----------------------|---------|-------------------------------------|----------------------|---------|
|                       |                   |          | n (%)                                  | RR (95%-CI)           | P-value | n (%)                               | RR (95%-CI)          | P-value |
| <b>1 minute</b>       | <b>0-2 points</b> | 54 (3)   | 5 (9)                                  | 6.07 (1.82 to 20.28)  | 0.001   | 5 (9)                               | 3.80 (1.29 to 11.18) | 0.01    |
|                       | <b>3-4</b>        | 732 (40) | 37 (5)                                 | 3.32 (1.32 to 8.36)   | 0.006   | 37 (5)                              | 2.07 (0.98 to 4.40)  | 0.05    |
|                       | <b>5-6</b>        | 709 (39) | 18 (3)                                 | 1.67 (0.62 to 4.45)   | 0.30    | 28 (4)                              | 1.62 (0.75 to 3.51)  | 0.21    |
|                       | <b>7</b>          | 328 (18) | 5 (2)                                  | 1.00                  |         | 8 (2)                               | 1.00                 |         |
| <b>5 minutes</b>      | <b>0-2</b>        | 74 (4)   | 7 (10)                                 | 11.40 (2.42 to 53.69) | <.001   | 1 (1)                               | 0.54 (0.07 to 4.44)  | 0.56    |
|                       | <b>3-4</b>        | 697 (38) | 40 (6)                                 | 6.92 (1.68 to 28.40)  | 0.001   | 39 (6)                              | 2.25 (0.96 to 5.24)  | 0.05    |
|                       | <b>5-6</b>        | 818 (45) | 16 (2)                                 | 2.36 (0.55 to 10.18)  | 0.23    | 32 (4)                              | 1.57 (0.66 to 3.71)  | 0.29    |
|                       | <b>7</b>          | 241 (13) | 2 (1)                                  | 1.00                  |         | 6 (3)                               | 1.00                 |         |
| <b>10 minutes</b>     | <b>0-2</b>        | 145 (8)  | 6 (4)                                  | 2.37 (0.68 to 8.25)   | 0.16    | 2 (1)                               | 0.79 (0.15 to 4.26)  | 0.78    |
|                       | <b>3-4</b>        | 493 (28) | 34 (7)                                 | 3.95 (1.42 to 10.99)  | 0.003   | 30 (6)                              | 3.48 (1.24 to 9.77)  | 0.01    |
|                       | <b>5-6</b>        | 921 (52) | 21 (2)                                 | 1.31 (0.45 to 3.77)   | 0.62    | 40 (4)                              | 2.49 (0.90 to 6.88)  | 0.06    |
|                       | <b>7</b>          | 229 (13) | 4 (2)                                  | 1.00                  |         | 4 (2)                               | 1.00                 |         |

**Legend:** Shown are absolute numbers (N) of patients with the respective scores and numbers of patients (n). Relative risk (RR), 95%-Confidence Interval (95%-CI) and P-values were calculated for any of the outcome data using the highest score (7) of the *Expanded-Apgar* as reference value.
