# Supplementary material for: Neonatal assessment in the delivery room – Trial to Evaluate a Specified Type of Apgar (TEST-Apgar)
Source: Springer Nature journal article supplement (doi:10.1186/s12887-015-0334-7), 2015-03-07
Supplement: MOESM2 [file 9746856]

Additional File 2, Table E *Specified-Apgar* and the relative risk of poor outcome and morbidity in survivors

| <i>Specified-Apgar</i> |                   | N (%)     | Poor Outcome |                     |         | Morbidity in Survivors |                     |         |
|------------------------|-------------------|-----------|--------------|---------------------|---------|------------------------|---------------------|---------|
|                        |                   |           | n (%)        | RR (95%-CI)         | P-value | n (%)                  | RR (95%-CI)         | P-value |
| <b>1 minute</b>        | <b>0-3 points</b> | 321 (17)  | 212 (66)     | 1.81 (1.62 to 2.03) | <.001   | 140 (44)               | 1.45 (1.24 to 1.70) | <.001   |
|                        | <b>4-6</b>        | 569 (31)  | 284 (50)     | 1.37 (1.22 to 1.54) | <.001   | 222 (39)               | 1.30 (1.13 to 1.50) | <.001   |
|                        | <b>7-10</b>       | 947 (52)  | 345 (36)     | 1.00                |         | 284 (30)               | 1.00                |         |
| <b>5 minutes</b>       | <b>0-3</b>        | 56 (3)    | 43 (77)      | 1.92 (1.64 to 2.25) | <.001   | 16 (29)                | 0.88 (0.58 to 1.33) | 0.52    |
|                        | <b>4-6</b>        | 301 (17)  | 202 (67)     | 1.68 (1.52 to 1.86) | <.001   | 145 (48)               | 1.48 (1.29 to 1.70) | <.001   |
|                        | <b>7-10</b>       | 1456 (80) | 582 (40)     | 1.00                |         | 475 (33)               | 1.00                |         |
| <b>10 minutes</b>      | <b>0-3</b>        | 16 (1)    | 15 (94)      | 2.16 (1.88 to 2.48) | <.001   | 5 (31)                 | 0.90 (0.43 to 1.87) | 0.77    |
|                        | <b>4-6</b>        | 104 (6)   | 71 (68)      | 1.57 (1.36 to 1.81) | <.001   | 40 (38)                | 1.11 (0.86 to 1.43) | 0.43    |
|                        | <b>7-10</b>       | 1662 (93) | 722 (43)     | 1.00                |         | 577 (35)               | 1.00                |         |

**Legend:** Shown are absolute numbers (N) of patients with the respective scores and numbers of patients (n). Relative risk (RR), 95%-Confidence Interval (95%-CI) and P-values were calculated for any of the outcome data using the highest score (7-10) of the *Specified-Apgar* as reference value.

Additional File 2, Table F: *Specified-Apgar* and the relative risk of death and perinatal mortality

| <i>Specified-Apgar</i> |                   | N (%)     | Death   |                      |         | Perinatal Mortality |                       |         |
|------------------------|-------------------|-----------|---------|----------------------|---------|---------------------|-----------------------|---------|
|                        |                   |           | n (%)   | RR (95%-CI)          | P-value | n (%)               | RR (95%-CI)           | P-value |
| <b>1 minute</b>        | <b>0-3 points</b> | 321 (17)  | 72 (22) | 3.48 (2.54 to 4.78)  | <.001   | 42 (13)             | 5.63 (3.42 to 9.29)   | <.001   |
|                        | <b>4-6</b>        | 569 (31)  | 62 (11) | 1.69 (1.21 to 2.37)  | 0.002   | 31 (5)              | 2.35 (1.37 to 4.01)   | <.001   |
|                        | <b>7-10</b>       | 947 (52)  | 61 (6)  | 1.00                 |         | 22 (2)              | 1.00                  |         |
| <b>5 minutes</b>       | <b>0-3</b>        | 56 (3)    | 27 (48) | 6.56 (4.73 to 9.10)  | <.001   | 18 (32)             | 10.88 (6.73 to 17.61) | <.001   |
|                        | <b>4-6</b>        | 301 (17)  | 57 (19) | 2.58 (1.92 to 3.47)  | <.001   | 32 (11)             | 3.60 (2.32 to 5.59)   | <.001   |
|                        | <b>7-10</b>       | 1456 (80) | 107 (7) | 1.00                 |         | 43 (3)              | 1.00                  |         |
| <b>10 minutes</b>      | <b>0-3</b>        | 16 (1)    | 10 (63) | 7.16 (4.75 to 10.80) | <.001   | 8 (50)              | 13.19 (7.64 to 22.78) | <.001   |
|                        | <b>4-6</b>        | 104 (6)   | 31 (30) | 3.42 (2.45 to 4.77)  | <.001   | 21 (20)             | 5.33 (3.39 to 8.37)   | <.001   |
|                        | <b>7-10</b>       | 1662 (93) | 145 (9) | 1.00                 |         | 63 (4)              | 1.00                  |         |

**Legend:** Shown are absolute numbers (N) of patients with the respective scores and numbers of patients (n). Relative risk (RR), 95%-Confidence Interval (95%-CI) and P-values were calculated for any of the outcome data using the highest score (7-10) of the *Specified-Apgar* as reference value.

Additional File 2, Table G. *Specified-Apgar* and the relative risk of BPD and ROP

| <i>Specified-Apgar</i> |                   | N (%)     | Bronchopulmonary Dysplasia |                     |         | Retinopathy of Prematurity |                     |         |
|------------------------|-------------------|-----------|----------------------------|---------------------|---------|----------------------------|---------------------|---------|
|                        |                   |           | n (%)                      | RR (95%-CI)         | P-value | n (%)                      | RR (95%-CI)         | P-value |
| <b>1 minute</b>        | <b>0-3 points</b> | 321 (17)  | 98 (31)                    | 1.76 (1.42 to 2.19) | <.001   | 57 (18)                    | 2.03 (1.48 to 2.77) | <.001   |
|                        | <b>4-6</b>        | 569 (31)  | 152 (27)                   | 1.54 (1.27 to 1.87) | <.001   | 94 (17)                    | 1.88 (1.43 to 2.48) | <.001   |
|                        | <b>7-10</b>       | 947 (52)  | 164 (17)                   | 1.00                |         | 83 (9)                     | 1.00                |         |
| <b>5 minutes</b>       | <b>0-3</b>        | 56 (3)    | 11 (20)                    | 0.95 (0.55 to 1.62) | 0.84    | 9 (16)                     | 1.44 (0.78 to 2.66) | 0.25    |
|                        | <b>4-6</b>        | 301 (17)  | 92 (31)                    | 1.47 (1.21 to 1.80) | <.001   | 56 (19)                    | 1.66 (1.26 to 2.19) | <.001   |
|                        | <b>7-10</b>       | 1456 (80) | 302 (21)                   | 1.00                |         | 163 (11)                   | 1.00                |         |
| <b>10 minutes</b>      | <b>0-3</b>        | 16 (1)    | 4 (25)                     | 1.14 (0.48 to 2.67) | 0.77    | 3 (19)                     | 1.54 (0.55 to 4.29) | 0.42    |
|                        | <b>4-6</b>        | 104 (6)   | 25 (24)                    | 1.09 (0.77 to 1.56) | 0.62    | 17 (16)                    | 1.34 (0.85 to 2.11) | 0.21    |
|                        | <b>7-10</b>       | 1662 (93) | 365 (22)                   | 1.00                |         | 203 (12)                   | 1.00                |         |

**Legend:** Shown are absolute numbers (N) of patients with the respective scores and numbers of patients (n). Relative risk (RR), 95%-Confidence Interval (95%-CI) and P-values were calculated for any of the outcome data using the highest score (7-10) of the *Specified-Apgar* as reference value.

**Additional File 2, Table H. Specified-Apgar and the relative risk of IVH and CPL**

| <i>Specified-Apgar</i> |                   | N (%)     | Intraventricular Haemorrhage > Grade 3 |                      |         | Cystic Periventricular Leukomalacia |                     |         |
|------------------------|-------------------|-----------|----------------------------------------|----------------------|---------|-------------------------------------|---------------------|---------|
|                        |                   |           | n (%)                                  | RR (95%-CI)          | P-value | n (%)                               | RR (95%-CI)         | P-value |
| <b>1 minute</b>        | <b>0-3 points</b> | 321 (17)  | 21 (7)                                 | 2.48 (1.41 to 4.37)  | 0.001   | 10 (3)                              | 0.74 (0.37 to 1.46) | 0.37    |
|                        | <b>4-6</b>        | 569 (31)  | 19 (3)                                 | 1.26 (0.70 to 2.28)  | 0.43    | 27 (5)                              | 1.12 (0.70 to 1.81) | 0.63    |
|                        | <b>7-10</b>       | 947 (52)  | 25 (3)                                 | 1.00                 |         | 40 (4)                              | 1.00                |         |
| <b>5 minutes</b>       | <b>0-3</b>        | 56 (3)    | 4 (7)                                  | 2.54 (0.94 to 6.84)  | 0.06    | 1 (2)                               | 0.42 (0.06 to 2.97) | 0.36    |
|                        | <b>4-6</b>        | 301 (17)  | 17 (6)                                 | 2.01 (1.16 to 3.48)  | 0.01    | 14 (5)                              | 1.09 (0.62 to 1.92) | 0.76    |
|                        | <b>7-10</b>       | 1456 (80) | 41 (3)                                 | 1.00                 |         | 62 (4)                              | 1.00                |         |
| <b>10 minutes</b>      | <b>0-3</b>        | 16 (1)    | 2 (13)                                 | 4.00 (1.06 to 15.01) | 0.03    | 1 (6)                               | 1.44 (0.21 to 9.75) | 0.70    |
|                        | <b>4-6</b>        | 104 (6)   | 7 (7)                                  | 2.15 (1.00 to 4.62)  | 0.04    | 4 (4)                               | 0.89 (0.33 to 2.38) | 0.81    |
|                        | <b>7-10</b>       | 1662 (93) | 52 (3)                                 | 1.00                 |         | 72 (4)                              | 1.00                |         |

**Legend:** Shown are absolute numbers (N) of patients with the respective scores and numbers of patients (n). Relative risk (RR), 95%-Confidence Interval (95%-CI) and P-values were calculated for any of the outcome data using the highest score (7-10) of the Specified-Apgar as reference value.
